# Supplementary material for: Facile synthesis of ionic-liquid functionalized graphite oxide nanosheets for a highly efficient fuel cell
Source: Royal Society of Chemistry journal article supplement (doi:10.1039/c3ra23343j), 2013-01-01
Supplement: c3ra23343j.pdf [file c3ra23343j.pdf]

## Supporting information

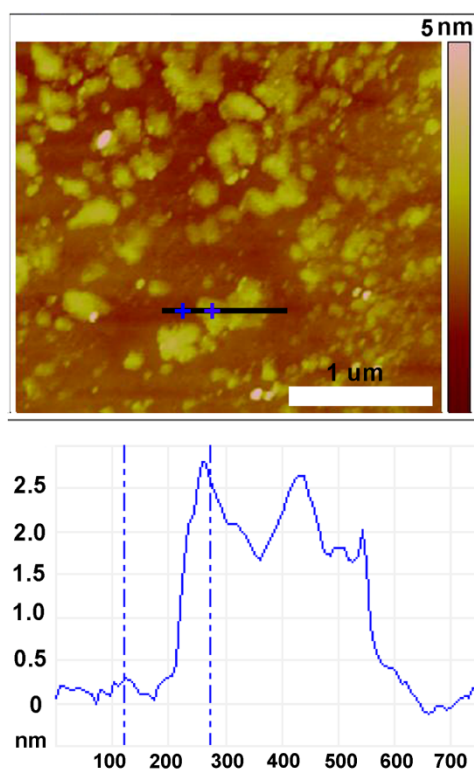

Fig. S1 AFM image and height distribution histograms of [BMI]-GONs on a silicon substrate.

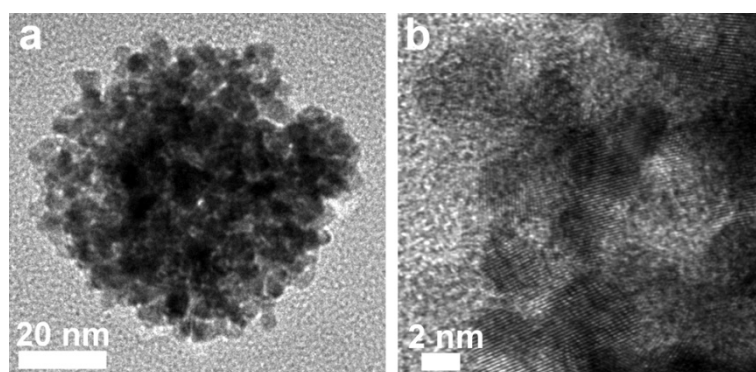

Fig. S2 TEM and HRTEM images of the Pt nanosphere on the [BMI]-GONs.

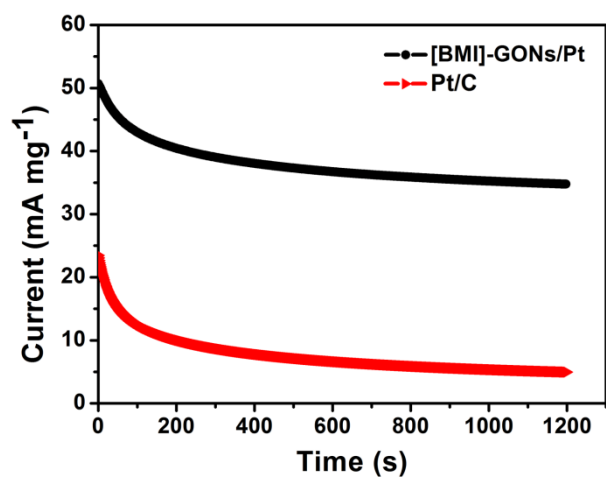

Fig. S3 Chronoamperometry curves for [BMI]-GONs/Pt and Pt/C in 0.5 M H<sub>2</sub>SO<sub>4</sub>.
